# Supplementary material
Source: ML conference proceedings conference paper supplement (https://openaccess.thecvf.com/content/ICCV_2017/html/Selvaraju_Grad-CAM_Visual_Explanations_ICCV_2017_paper.html)
Supplement: Supplementary file 2 [file Selvaraju_Grad-CAM_Visual_Explanations_ICCV_2017_supplemental.zip]

Archive with 11 entries (8 files):
- Camera-ready/
- Camera-ready/.DS_Store
- __MACOSX/
- __MACOSX/Camera-ready/
- __MACOSX/Camera-ready/._.DS_Store
- Camera-ready/0222-supp.pdf
- __MACOSX/Camera-ready/._0222-supp.pdf
- Camera-ready/Grad-CAM_demo.mp4
- __MACOSX/Camera-ready/._Grad-CAM_demo.mp4
- Camera-ready/README.txt
- __MACOSX/Camera-ready/._README.txt
