# Supplementary material
Source: ML conference proceedings conference paper supplement (https://openaccess.thecvf.com/content/ICCV_2017/html/Selvaraju_Grad-CAM_Visual_Explanations_ICCV_2017_paper.html)
Supplement: Supplementary file 2 [file Selvaraju_Grad-CAM_Visual_Explanations_ICCV_2017_supplemental.zip › Camera-ready/README.txt]

The contents of this zip folder are as follows:

1. Supplementary.pdf  - pdf containing more analysis, comparisons, experiments and qualitative results.
2. Grad-CAM_demo.mp4 - Real-time video of the online demo for VQA and Image Captioning
